# Supplementary material
Source: PubMed Central journal article supplement (PMC4393437)
Supplement: AEM.00499-15_zam999116213so1.pdf [file AEM.00499-15_zam999116213so1.pdf]

**Table S1:** Number of genes significantly affected in D39 *ΔccpA* as compared to the D39 wild-type grown in SM17 (0.5% sialic acid + M17) medium. Genes affected by more than 2-fold in D39 *ΔccpA* as compared to the D39 wild type are selected.

| <b>Functional categories</b>                                     | <b>Total</b> | <b>Up</b>  | <b>Down</b> |
|------------------------------------------------------------------|--------------|------------|-------------|
| C: Energy production and conversion                              | 14           | 3          | 11          |
| D: Cell cycle control, cell division, chromosome partitioning    | 3            | 0          | 3           |
| E: Amino acid transport and metabolism                           | 34           | 12         | 22          |
| F: Nucleotide transport and metabolism                           | 8            | 4          | 4           |
| G: Carbohydrate transport and metabolism                         | 59           | 46         | 13          |
| H: Coenzyme transport and metabolism                             | 7            | 2          | 5           |
| I: Lipid transport and metabolism                                | 12           | 2          | 10          |
| J: Translation, ribosomal structure and biogenesis               | 48           | 5          | 43          |
| K: Transcription                                                 | 21           | 15         | 6           |
| L: Replication, recombination and repair                         | 14           | 3          | 11          |
| M: Cell wall/membrane/envelope biogenesis                        | 14           | 6          | 8           |
| O: Posttranslational modification, protein turnover, chaperones  | 13           | 10         | 3           |
| P: Inorganic ion transport and metabolism                        | 15           | 7          | 8           |
| Q: Secondary metabolite biosynthesis, transport and catabolism   | 2            | 1          | 1           |
| R: General function prediction only                              | 31           | 13         | 18          |
| S: Function unknown                                              | 21           | 13         | 8           |
| T: Signal transduction mechanisms                                | 10           | 6          | 4           |
| U: Intracellular trafficking, secretion, and vesicular transport | 5            | 3          | 2           |
| V: Defense mechanisms                                            | 15           | 8          | 7           |
| <b>Total number of genes</b>                                     | <b>346</b>   | <b>159</b> | <b>187</b>  |
